# Supplementary material
Source: Elsevier journal article supplement (https://www.sciencedirect.com/science/article/pii/S253006442200075X)
Supplement: mmc1 [file S253006442200075X:mmc1.xlsx]

## Sheet: Plan1
Species name in Brazilian Red List	Species name in birdtree.org	Presence in non-conservation facilities	Source of information	Presence in ex-situ conservation facilities	Source of information	Organised ex situ conservation plan	Source of information	Diet	Body_Mass (g)	Level of threat
Tinamiformes
Tinamidae
Tinamus tao	Tinamus tao	not		yes (PO; WS)		not		Omnivore	1651.3	VU
Crypturellus noctivagus noctivagus	Crypturellus noctivagus	yes (LT)	Alves et al. (2012); Costa et al. (2018); Vilella (2012); Bastos et al. (2008)	yes (PO)		not		Seed	564.7	VU
Crypturellus noctivagus zabele	Crypturellus noctivagus	not		yes (PO)		not		Seed	564.7	VU
Nothura minor	Nothura minor	not		yes (PO)		not		Omnivore	165.9	EN
Taoniscus nanus	Taoniscus nanus	yes (LT)	Vilella (2012)	yes (PO)		not		Omnivore	43	EN
Anseriformes
Anatidae
Mergus octosetaceus	Mergus octosetaceus	not		yes (PO; LT)	Hughes et al. (2006)	yes (AP, PO, ST)	AZAB (2018); ICMBio (2020)	VertFish	866.5	CR
Galliformes
Cracidae
Penelope superciliaris alagoensis	Penelope superciliaris	not		yes (PO; LT)	Silveira et al. (2008)	not		Fruit	972.5	CR
Penelope ochrogaster	Penelope ochrogaster	yes (PO)		yes (WS)		not		Fruit	1179.7	VU
Penelope pileata	Penelope pileata	not		yes (PO; LT)	Silveira et al. (2008)	not		Fruit	1299.9	VU
Penelope jacucaca	Penelope jacucaca	yes (LT)	Vilella (2012);	yes (PO; LT)	Silveira et al. (2008)	yes (ST)	AZAB (2018)	Fruit	1282	VU
Aburria jacutinga	Pipile jacutinga	yes (LT)	Costa et al. (2018); Souza & Vilella (2013); Preuss (2011)	yes (PO; LT)	Silveira et al. (2008)	yes (AP, PO, ST)	AZAB (2018); ICMBio (2018)	Fruit	1245.5	EN
Ortalis guttata remota	Ortalis guttata	not		not		not		Fruit	547.7	CR
Crax blumenbachii	Crax blumenbachii	yes (LT)	Costa et al. (2018); Vilella (2012); Souza & Vilella (2013);	yes (PO; LT)	Wajntal et al. (2004)	yes (AP, PO)	ICMBio (2018)	Fruit	3500	CR
Crax globulosa	Crax globulosa	yes (PO)		yes (PO; LT)	Silveira et al. (2008)	not		Omnivore	2500	EN
Crax fasciolata pinima	Crax fasciolata	yes (PO)		not		not		Fruit	2600	CR
Pauxi mitu	Mitu mitu	yes (LT)	Silveira et al. (2004)	yes (PO; LT)	Silveira et al. (2008); Francisco et al. (2020)	yes (AP, PO)	ICMBio (2018)	Fruit	2900.2	CR
Odontophoridae
Odontophorus capueira plumbeicollis	Odontophorus capueira	yes (PO)		not		not		Fruit	419.2	CR
Procellariiformes
Diomedeidae
Diomedea dabbenena	Diomedea dabbenena	not		not		not		Invertebrate	6961.3	CR
Diomedea epomophora	Diomedea epomophora	not		not		not		Invertebrate	8657.8	VU
Diomedea exulans	Diomedea exulans	yes (LT)	Vilella (2012)	yes (WS)		not		Invertebrate	8138.1	CR
Diomedea sanfordi	Diomedea sanfordi	not		not		not		Invertebrate	8905.6	EN
Thalassarche chlororhynchos	Thalassarche chlororhynchos	yes (LT)	Vilella (2012)	not		not		Omnivore	2219.4	EN
Procellariidae
Procellaria aequinoctialis	Procellaria aequinoctialis	yes (LT)	Vilella (2012)	not		not		Invertebrate	1235.5	VU
Procellaria conspicillata	Procellaria conspicillata	not		not		not		Invertebrate	1187.7	VU
Pterodroma arminjoniana	Pterodroma arminjoniana	not		not		not		Invertebrate	382.5	CR
Pterodroma deserta	Pterodroma feae	not		not		not		Omnivore	318	CR
Pterodroma incerta	Pterodroma incerta	not		not		not		Invertebrate	545	EN
Pterodroma madeira	Pterodroma madeira	not		not		not		Invertebrate	214.3	EN
Puffinus lherminieri	Puffinus lherminieri	not		not		not		Invertebrate	203.4	CR
Phaethontiformes
Phaethontidae
Phaethon aethereus	Phaethon aethereus	yes (LT)	Vilella (2012)	not		not		VertFish	724.9	EN
Phaethon lepturus	Phaethon lepturus	not		yes (LT)	Conde et al. (2011)	not		VertFish	339	EN
Suliformes
Fregatidae
Fregata ariel	Fregata ariel	not		not		not		VertFish	790	CR
Fregata minor	Fregata minor	not		yes (WS)		not		VertFish	1400	CR
Sulidae
Sula sula	Sula sula	not		yes (WS)		not		Omnivore	1003	EN
Pelecaniformes
Ardeidae
Tigrisoma fasciatum	Tigrisoma fasciatum	yes (LT)	Vilella (2012)	yes (WS)		not		Omnivore	850	VU
Accipitriformes
Accipitridae
Amadonastur lacernulatus	Leucopternis lacernulatus	yes (LT)	De Luca et al. (2017); Charity & Ferreira (2020); Vilella (2012)	yes (PO)		not		Vert	595.5	VU
Leptodon forbesi	Leptodon forbesi	not		not		not		Omnivore	571	EN
Morphnus guianensis	Morphnus guianensis	not		yes (PO)		not		Vert	1750	VU
Harpia harpyja	Harpia harpyja	yes (LT)	Costa et al. (2018); Vilella (2012); Da Silva & Lima (2014)	yes (PO)		yes (AP, PO)	ICMBio (2016)	Vert	5650	VU
Urubitinga coronata	Harpyhaliaetus coronatus	yes (LT)	Vilella (2012)	yes (PO)		not		Vert	2950	EN
Circus cinereus	Circus cinereus	not		yes (WS)		not		Vert	406.1	VU
Gruiformes
Psophiidae
Psophia dextralis	Psophia viridis	yes (LT)	Alves et al. (2013)	yes (PO)		not		Fruit	1071	VU
Psophia interjecta	Psophia crepitans	not		yes (PO)		not		Fruit	1071	VU
Psophia obscura	Psophia leucoptera	not		yes (PO)		not		Fruit	1071	CR
Rallidae
Porzana spiloptera	Porzana spiloptera	not		not		not		Seed	61.1	EN
Charadriiformes
Charadriidae
Charadrius wilsonia	Charadrius wilsonia	not		not		not		Invertebrate	58.8	VU
Scolopacidae
Limnodromus griseus	Limnodromus griseus	not		yes (LT)	Conde et al. (2011)	not		Invertebrate	113.9	CR
Calidris canutus	Calidris canutus	yes (LT)	Vilella (2012)	yes (LT, WS)	Conde et al. (2011)	not		Invertebrate	147.2	CR
Calidris pusilla	Calidris pusilla	not		yes (LT)	Conde et al. (2011)	not		Invertebrate	29.9	EN
Calidris subruficollis	Tryngites subruficollis	not		not				Invertebrate	71.8	EN
Sternidae
Sterna dougallii	Sterna dougallii	not		not		not		VertFish	112.2	VU
Sterna hirundinacea	Sterna hirundinacea	yes (LT)	Vilella (2012)	not		not		VertFish	195	VU
Thalasseus maximus	Sterna maxima	not		yes (LT)	Conde et al. (2011)	not		VertFish	400.1	EN
Columbiformes
Columbidae
Claravis geoffroyi	Claravis godefrida	not		yes (PO; LT)	Lees et al. (2021)	not		Seed	43.5	CR
Columbina cyanopis	Columbina cyanopis	not		not		not		Seed	45.6	CR
Cuculiformes
Cuculidae
Neomorphus geoffroyi	Neomorphus geoffroyi	not		not		not		Omnivore	362.5	VU
Neomorphus geoffroyi amazonicus	Neomorphus geoffroyi	not		not		not		Omnivore	362.5	VU
Neomorphus geoffroyi dulcis	Neomorphus geoffroyi	not		yes (PO)		not		Omnivore	362.5	CR
Neomorphus geoffroyi geoffroyi	Neomorphus geoffroyi	not		not		not		Omnivore	362.5	CR
Neomorphus squamiger	Neomorphus squamiger	not		not		not		Omnivore	362.5	VU
Strigiformes
Strigidae
Pulsatrix perspicillata pulsatrix	Pulsatrix perspicillata	not		yes (WS)		not		Vert	1073	VU
Strix huhula albomarginata	Strix huhula	yes (LT)	De Luca et al. (2017)	not		not		Invertebrate	383.5	VU
Nyctibiiformes
Nyctibiidae
Nyctibius aethereus aethereus	Nyctibius aethereus	yes (LT)	Vilella (2012)	not		not		Invertebrate	402	EN
Nyctibius leucopterus	Nyctibius leucopterus	not		not		not		Invertebrate	83.7	CR
Caprimulgiformes
Caprimulgidae
Hydropsalis candicans	Eleothreptus candicans	not		not		not		Invertebrate	48.9	VU
Apodiformes
Trochilidae
Phaethornis aethopygus	Phaethornis atrimentalis	not		not		not		Nectar	2.6	VU
Phaethornis bourcieri major	Phaethornis bourcieri	not		not		not		Nectar	4.3	VU
Phaethornis margarettae	Phaethornis malaris	not		not		not		Nectar	5.6	EN
Phaethornis margarettae camargoi	Phaethornis malaris	not		not		not		Nectar	5.6	CR
Discosura langsdorffi langsdorffi	Discosura langsdorffi	not		not		not		Nectar	3	EN
Glaucis dohrnii	Glaucis dohrnii	not		not		not		Nectar	6.4	EN
Lophornis gouldii	Lophornis gouldii	not		not		not		Nectar	2.5	VU
Thalurania watertonii	Thalurania watertonii	not		not		not		Nectar	4.5	EN
Augastes lumachella	Augastes lumachella	not		not		not		Nectar	4.2	EN
Trogoniformes
Trogonidae
Trogon collaris eytoni	Trogon collaris	not		not		not		Invertebrate	59.3	EN
Coraciiformes
Momotidae
Momotus momota marcgraviana	Momotus momota	not		not		not		Omnivore	127.5	EN
Galbuliformes
Bucconidae
Monasa morphoeus morphoeus	Monasa morphoeus	not		not		not		Invertebrate	84.9	EN
Piciformes
Capitonidae
Capito dayi	Capito dayi	not		not		not		Fruit	67.2	VU
Ramphastidae
Selenidera gouldii baturitensis	Selenidera gouldii	not		not		not		Fruit	175.4	EN
Pteroglossus bitorquatus bitorquatus	Pteroglossus bitorquatus	yes (LT)	Alves et al. (2012); Alves et al. (2013); Queiroz et al. (2016)	yes (PO)		not		Fruit	143.5	VU
Picidae
Picumnus varzeae	Picumnus varzeae	not		not		not		Invertebrate	11.3	EN
Piculus polyzonus	Piculus chrysochloros	not		not		not		Invertebrate	80.5	EN
Piculus paraensis	Piculus aurulentus	not		not		not		Invertebrate	80.5	EN
Celeus flavus subflavus	Celeus flavus	not		not		not		Invertebrate	200	CR
Celeus obrieni	Celeus obrieni	not		not		not		Invertebrate	95	VU
Celeus torquatus pieteroyensi	Celeus torquatus	not		not		not		Invertebrate	120.5	EN
Celeus torquatus tinnunculus	Celeus torquatus	not		not		not		Invertebrate	120.5	VU
Celeus galeatus	Dryocopus galeatus	not		not		not		Invertebrate	137	EN
Psittaciformes
Psittacidae
Anodorhynchus leari	Anodorhynchus leari	yes (LT)	Alves et al. (2013); Queiroz et al. (2016); Costa et al. (2018); Souza & Vilella (2013)	yes (PO; LT)	Amaral et al. (2012)	yes (AP)	ICMBio (2012)	Fruit	940	EN
Cyanopsitta spixii	Cyanopsitta spixii	yes (LT)	Queiroz et al. (2016)	yes (PO; LT)	Barros et al. (2012)	yes (AP)	ICMBio (2012)	Omnivore	274	CR
Guaruba guarouba	Guaruba guarouba	yes (LT)	Alves et al. (2013); Queiroz et al. (2016); Costa et al. (2018); Charity & Ferreira (2020); Vilella (2012); Souza & Vilella (2013); Ferreira & Glock (2004)	yes (PO; LT)	Vilarta et al. (2021)	yes (AP, ST)	AZAB (2018); ICMBio (2016)	Fruit	194	VU
Aratinga solstitialis	Aratinga solstitialis	yes (LT)	Alves et al. (2013); Queiroz et al. (2016); De Luca et al. (2017); Costa et al. (2018)	yes (PO)		yes (AP, PO, ST)	AZAB (2018); ICMBio (2016)	Fruit	119.6	EN
Pyrrhura cruentata	Pyrrhura cruentata	yes (LT)	Queiroz et al. (2016); De Luca et al. (2017); Charity & Ferreira (2020); Vilella (2012); Souza & Vilella (2013)	yes (PO)		yes (AP, PO)	ICMBio (2018)	Omnivore	75.9	VU
Pyrrhura lepida	Pyrrhura lepida	yes (LT)	Queiroz et al. (2016); Vilella (2012);	yes (PO)		not		Fruit	75	VU
Pyrrhura coerulescens	Pyrrhura perlata	yes (LT)	Queiroz et al. (2016)	yes (PO)		not		Fruit	79	VU
Pyrrhura griseipectus	Pyrrhura griseipectus	yes (LT)	Alves et al. (2013); Queiroz et al. (2016); Vilella (2012); Fernandes-Ferreira (2012)	yes (PO)		not		Seed	75.9	EN
Pyrrhura leucotis	Pyrrhura leucotis	yes (LT)	Queiroz et al. (2016); De Luca et al. (2017); Vilella (2012); Souza & Vilella (2013);	yes (PO)		not		Seed	75.9	VU
Pyrrhura pfrimeri	Pyrrhura pfrimeri	yes (LT)	Queiroz et al. (2016)	yes (PO)		not		Seed	75.9	EN
Touit melanonotus	Touit melanonotus	not		not		not		Fruit	66.5	VU
Touit surdus	Touit surdus	not		not		not		Fruit	66.5	VU
Pionus reichenowi	Pionus menstruus	yes (LT)	Queiroz et al. (2016)	yes (PO)		not		Seed	251.5	VU
Pyrilia vulturina	Pyrilia vulturina	yes (LT)	Alves et al. (2013)	yes (PO)		not		Fruit	148.2	VU
Amazona pretrei	Amazona pretrei	yes (LT)	Araujo et al. (2010); Vanstreels et al. (2010); Alves et al. (2013);Queiroz et al. (2016); Costa et al. (2018); Vilella (2012); Ferreira & Glock (2004); Bastos et al. (2008)	yes (PO; LT)	Schunck et al. (2010)	yes (AP)	ICMBio (2020)	Fruit	272.8	VU
Amazona rhodocorytha	Amazona rhodocorytha	yes (PO; LT)	Araujo et al. (2010); Vanstreels et al. (2010); Alves et al. (2013); De Luca et al. (2017); Costa et al. (2018); Charity & Ferreira (2020); Vilella (2012); Souza & Vilella (2013); Borges et al. (2006)	yes (PO; LT)	Schunck et al. (2010)	yes (AP)	ICMBio (2020)	Fruit	474.3	VU
Amazona vinacea	Amazona vinacea	yes (LT)	Araujo et al. (2010); Vanstreels et al. (2010); Alves et al. (2013); Queiroz et al. (2016); De Luca et al. (2017); Costa et al. (2018); Charity & Ferreira (2020); Vilella (2012); Souza & Vilella (2013); Borges et al. (2006)	yes (PO; LT)	Schunck et al. (2010)	yes (AP)	ICMBio (2020)	Seed	254	VU
Passeriformes
Thamnophilidae
Dysithamnus plumbeus	Dysithamnus plumbeus	not		not		not		Invertebrate	20.5	EN
Myrmotherula fluminensis	Myrmotherula fluminensis	not		not		not		Invertebrate	9	CR
Myrmotherula klagesi	Myrmotherula klagesi	not		not		not		Invertebrate	7.9	VU
Myrmotherula minor	Myrmotherula minor	not		not		not		Invertebrate	6.4	VU
Myrmotherula snowi	Myrmotherula snowi	not		not		not		Invertebrate	9.7	CR
Myrmotherula urosticta	Myrmotherula urosticta	not		not		not		Invertebrate	8.9	VU
Formicivora erythronotos	Formicivora erythronotos	not		not		not		Invertebrate	10.3	CR
Formicivora grantsaui	Formicivora rufa	not		not		not		Invertebrate	10	EN
Formicivora littoralis	Formicivora littoralis	not		not		not		Invertebrate	14.2	EN
Formicivora paludicola	Formicivora grisea	not		not		not		Invertebrate	9.9	CR
Thamnomanes caesius caesius	Thamnomanes caesius	not		not		not		Invertebrate	16.3	VU
Herpsilochmus pileatus	Herpsilochmus pileatus	not		not		not		Invertebrate	8.9	VU
Thamnophilus aethiops distans	Thamnophilus aethiops	not		not		not		Invertebrate	26.1	EN
Thamnophilus caerulescens cearensis	Thamnophilus caerulescens	not		not		not		Invertebrate	20.3	VU
Thamnophilus caerulescens pernambucensis	Thamnophilus caerulescens	not		not		not		Invertebrate	20.3	VU
Thamnophilus nigrocinereus tschudii	Thamnophilus nigrocinereus	not		not		not		Invertebrate	30	EN
Myrmoderus ruficaudus	Myrmeciza ruficauda	not		not		not		Invertebrate	29.7	EN
Rhopornis ardesiacus	Rhopornis ardesiacus	not		not		not		Invertebrate	25.9	EN
Cercomacra ferdinandi	Cercomacra ferdinandi	not		not		not		Invertebrate	15	VU
Formicivora acutirostris	Stymphalornis acutirostris	not		not		not		Invertebrate	9.6	EN
Hypocnemis ochrogyna	Hypocnemis ochrogyna	not		not		not		Invertebrate	12.6	VU
Pyriglena pernambucensis	Pyriglena leuconota	not		not		not		Invertebrate	31.6	VU
Pyriglena atra	Pyriglena atra	not		not		not		Invertebrate	32	EN
Phlegopsis nigromaculata confinis	Phlegopsis nigromaculata	not		not		not		Invertebrate	45.9	VU
Phlegopsis nigromaculata paraensis	Phlegopsis nigromaculata	not		not		not		Invertebrate	45.9	VU
Rhegmatorhina gymnops	Rhegmatorhina gymnops	not		not		not		Invertebrate	28.4	VU
Terenura sicki	Terenura sicki	not		not		not		Invertebrate	6.6	CR
Conopophagidae
Conopophaga cearae	Conopophaga cearae	not		not		not		Invertebrate	22	EN
Conopophaga lineata lineata	Conopophaga lineata	yes (LT)	Bastos et al. (2008)	not		not		Invertebrate	23.3	VU
Conopophaga melanops nigrifrons	Conopophaga melanops	not		not		not		Invertebrate	20.1	VU
Grallariidae
Grallaria varia distincta	Grallaria varia	not		not		not		Invertebrate	114.2	VU
Grallaria varia intercedens	Grallaria varia	not		not		not		Invertebrate	114.2	VU
Hylopezus paraensis	Hylopezus macularius	not		not		not		Invertebrate	44.1	VU
Rhinocryptidae
Eleoscytalopus psychopompus	Eleoscytalopus psychopompus	not		not		not		Invertebrate	17.8	EN
Merulaxis stresemanni	Merulaxis stresemanni	not		not		not		Invertebrate	37	CR
Scytalopus diamantinensis	Scytalopus speluncae	not		not		not		Invertebrate	14	EN
Scytalopus gonzagai	Scytalopus acutirostris	not		not		not		Invertebrate	14.4	EN
Scytalopus iraiensis	Scytalopus iraiensis	not		not		not		Invertebrate	13.6	EN
Scytalopus novacapitalis	Scytalopus novacapitalis	not		not		not		Invertebrate	18.3	EN
Formicariidae
Chamaeza nobilis fulvipectus	Chamaeza nobilis	not		not		not		Invertebrate	129.2	VU
Scleruridae
Sclerurus macconnelli bahiae	Sclerurus mexicanus	not		not		not		Invertebrate	23.8	VU
Sclerurus caudacutus caligineus	Sclerurus caudacutus	not		not		not		Invertebrate	37.1	CR
Sclerurus caudacutus umbretta	Sclerurus caudacutus	not		not		not		Invertebrate	37.1	CR
Sclerurus cearensis	Sclerurus scansor	not		not		not		Invertebrate	34.9	VU
Geositta poeciloptera	Geositta poeciloptera	not		not		not		Invertebrate	18	EN
Dendrocolaptidae
Dendrocincla taunayi	Dendrocincla turdina	not		not		not		Invertebrate	38	EN
Dendrocincla merula badia	Dendrocincla merula	not		not		not		Invertebrate	46.2	VU
Xiphorhynchus atlanticus	Xiphorhynchus fuscus	not		not		not		Invertebrate	21.8	VU
Xiphorhynchus guttatoides gracilirostris	Xiphorhynchus guttatus	not		not		not		Invertebrate	60.6	EN
Campylorhamphus cardosoi	Campylorhamphus procurvoides	not		not		not		Invertebrate	33.7	VU
Campylorhamphus multostriatus	Campylorhamphus pusillus	not		not		not		Invertebrate	33.7	VU
Campylorhamphus trochilirostris trochilirostris	Campylorhamphus trochilirostris	not		not		not		Invertebrate	41.6	EN
Lepidocolaptes wagleri	Lepidocolaptes squamatus	not		not		not		Invertebrate	27.5	EN
Dendrexetastes rufigula paraensis	Dendrexetastes rufigula	not		not		not		Invertebrate	70	EN
Dendrocolaptes retentus	Dendrocolaptes certhia	not		not		not		Invertebrate	66.6	VU
Dendrocolaptes medius	Dendrocolaptes hoffmannsi	not		not		not		Invertebrate	66.6	VU
Dendrocolaptes picumnus transfasciatus	Dendrocolaptes picumnus	not		not		not		Invertebrate	77.5	VU
Xiphocolaptes carajaensis	Xiphocolaptes promeropirhynchus	not		not		not		Invertebrate	105.7	VU
Xiphocolaptes falcirostris	Xiphocolaptes falcirostris	not		not		not		Invertebrate	110	VU
Hylexetastes brigidai	Hylexetastes brigidai	not		not		not		Invertebrate	110.4	VU
Xenopidae
Xenops minutus alagoanus	Xenops minutus	not		not		not		Invertebrate	11	VU
Furnariidae
Acrobatornis fonsecai	Acrobatornis fonsecai	not		not		not		Invertebrate	14.1	VU
Asthenes hudsoni	Asthenes hudsoni	not		not		not		Invertebrate	19	VU
Automolus lammi	Automolus leucophthalmus	not		not		not		Invertebrate	31.5	EN
Coryphistera alaudina	Coryphistera alaudina	not		not		not		Invertebrate	32.2	CR
Leptasthenura platensis	Leptasthenura platensis	not		not		not		Invertebrate	10.8	CR
Pseudoseisura lophotes	Pseudoseisura lophotes	not		yes (WS)		not		Invertebrate	71.6	VU
Synallaxis infuscata	Synallaxis infuscata	not		not		not		Invertebrate	18.1	EN
Synallaxis kollari	Synallaxis kollari	not		not		not		Invertebrate	16.2	EN
Cranioleuca muelleri	Cranioleuca muelleri	not		not		not		Invertebrate	14.5	VU
Thripophaga macroura	Thripophaga macroura	not		not		not		Invertebrate	21	VU
Cinclodes espinhacensis	Cinclodes pabsti	not		not		not		Invertebrate	49.3	EN
Pipridae
Neopelma aurifrons	Neopelma aurifrons	not		not		not		Fruit	14	EN
Lepidothrix vilasboasi	Lepidothrix vilasboasi	not		not		not		Fruit	6	VU
Lepidothrix iris	Lepidothrix iris	not		not		not		Fruit	8.3	EN
Lepidothrix iris iris	Lepidothrix iris	not		not		not		Fruit	8.3	EN
Antilophia bokermanni	Antilophia bokermanni	not		not		not		Fruit	20.2	CR
Tityridae
Schiffornis turdina intermedia	Schiffornis turdina	not		not		not		Omnivore	32	VU
Iodopleura pipra	Iodopleura pipra	not		not		not		Fruit	10	EN
Iodopleura pipra leucopygia	Iodopleura pipra	not		not		not		Fruit	10	CR
Iodopleura pipra pipra	Iodopleura pipra	not		not		not		Fruit	10	EN
Cotingidae
Carpornis melanocephala	Carpornis melanocephala	not		not		not		Fruit	64.2	VU
Lipaugus conditus	Tijuca condita	not		not		not		Fruit	80	VU
Xipholena atropurpurea	Xipholena atropurpurea	not		yes (WS)		not		Fruit	61.4	VU
Procnias albus	Procnias albus	not		yes (WS)		not		Fruit	213.2	VU
Cotinga maculata	Cotinga maculata	yes (PO)		yes (WS)		not		Fruit	65	CR
Pipritidae
Piprites chloris grisescens	Piprites chloris	not		not		not		Invertebrate	17	VU
Platyrinchidae
Platyrinchus mystaceus niveigularis	Platyrinchus mystaceus	not		not		not		Invertebrate	9.7	VU
Calyptura cristata	Calyptura cristata	not		not		not		Omnivore	5	CR
Rhynchocyclidae
Phylloscartes beckeri	Phylloscartes beckeri	not		not		not		Invertebrate	8.5	EN
Phylloscartes ceciliae	Phylloscartes ceciliae	not		not		not		Invertebrate	7.5	CR
Phylloscartes roquettei	Phylloscartes roquettei	not		not		not		Invertebrate	7	EN
Hemitriccus furcatus	Hemitriccus furcatus	not		not		not		Invertebrate	8.6	VU
Hemitriccus griseipectus naumburgae	Hemitriccus griseipectus	not		not		not		Invertebrate	8.9	VU
Hemitriccus kaempferi	Hemitriccus kaempferi	not		not		not		Invertebrate	8.6	VU
Hemitriccus mirandae	Hemitriccus mirandae	not		not		not		Invertebrate	8.6	VU
Tyrannidae
Stigmatura napensis napensis	Stigmatura napensis	not		not		not		Invertebrate	9.7	VU
Elaenia ridleyana	Elaenia ridleyana	not		not		not		Invertebrate	33	VU
Alectrurus tricolor	Alectrurus tricolor	not		not		not		Invertebrate	16	VU
Serpophaga hypoleuca pallida	Serpophaga hypoleuca	not		not		not		Invertebrate	6.1	VU
Attila spadiceus uropygiatus	Attila spadiceus	not		not		not		Omnivore	38.4	VU
Xolmis dominicanus	Xolmis dominicanus	not		not		not		Invertebrate	42.8	VU
Vireonidae
Vireo gracilirostris	Vireo gracilirostris	not		not		not		Invertebrate	17.4	VU
Tunchiornis ochraceiceps rubrifrons	Hylophilus ochraceiceps	not		not		not		Invertebrate	10.9	VU
Corvidae
Cyanocorax hafferi	Cyanocorax heilprini	not		not		not		Omnivore	168.6	VU
Turdidae
Cichlopsis leucogenys	Cichlopsis leucogenys	yes (LT)	Tavares et al. (2013)	not		not		Invertebrate	56.1	EN
Motacillidae
Anthus nattereri	Anthus nattereri	not		not		not		Invertebrate	19.5	VU
Passerelidae
Arremonops conirostris	Arremonops conirostris	not		yes (LT)	Conde et al. (2011)	not		Omnivore	34.9	VU
Icteridae
Anumara forbesi	Curaeus forbesi	yes (LT)	Pereira & Brito (2005); Alves et al. (2012); Queiroz et al. (2016); Costa et al. (2018); Charity & Ferreira (2020); Pagano et al. (2009)	not		not		Fruit	90	VU
Xanthopsar flavus	Xanthopsar flavus	yes (PO)		yes (WS)		not		Invertebrate	41.9	VU
Thraupidae
Conothraupis mesoleuca	Conothraupis mesoleuca	not		not		not		Invertebrate	20.1	EN
Coryphaspiza melanotis	Coryphaspiza melanotis	not		not		not		Omnivore	15.7	EN
Gubernatrix cristata	Gubernatrix cristata	yes (LT)	Pereira & Brito (2005); Araujo et al. (2010); Alves et al. (2012); Tavares et al. (2013); Queiroz et al. (2016); Costa et al. (2018); Charity & Ferreira (2020); Vilella (2012); Souza & Vilella (2013)	yes (LT)	Nascimento et al. (2014)	yes (AP)	ICMBio (2021)	Seed	48.4	CR
Nemosia rourei	Nemosia rourei	not		not		not		Invertebrate	19	CR
Tangara peruviana	Tangara peruviana	yes (LT)	Tavares et al. (2013); Queiroz et al. (2016); Charity & Ferreira (2020); Vilella (2012)	yes (WS)		not		Fruit	22	VU
Tangara cyanocephala cearensis	Tangara cyanocephala	yes (PO)		not		not		Fruit	18	VU
Tangara fastuosa	Tangara fastuosa	yes (LT)	Renctas (2001); Pereira & Brito (2005); Alves et al. (2012); Regueira & Bernard (2012); Tavares et al. (2013); Queiroz et al. (2016); Costa et al. (2018); Charity & Ferreira (2020); Vilella (2012); Souza & Vilella (2013);	yes (WS)		not		Fruit	20	VU
Tangara velia signata	Tangara velia	yes (LT)	Pereira & Brito (2005)	not		not		Fruit	21	VU
Sporophila beltoni	Sporophila plumbea	not		not		not		Seed	11.9	VU
Sporophila falcirostris	Sporophila falcirostris	yes (LT)	Alves et al. (2012); Tavares et al. (2013); Queiroz et al. (2016); Costa et al. (2018); Charity & Ferreira (2020); Vilella (2012); Souza & Vilella (2013);	yes (WS)		not		Seed	20	VU
Sporophila frontalis	Sporophila frontalis	yes (LT)	Alves et al. (2012); Tavares et al. (2013); Queiroz et al. (2016); De Luca et al. (2017); Costa et al. (2018); Charity & Ferreira (2020); Vilella (2012); Souza & Vilella (2013); Mayrinki (2016); Borges et al. (2006)	yes (WS)		not		Seed	20.4	VU
Sporophila hypoxantha	Sporophila hypoxantha	yes (LT)	Queiroz et al. (2016); Vilella (2012);	not		not		Seed	10.5	VU
Sporophila maximiliani	Oryzoborus maximiliani	yes (LT)	Renctas (2001); Alves et al. (2012); Tavares et al. (2013); Queiroz et al. (2016); Souto et al. 2017; Costa et al. (2018); Charity & Ferreira (2020); Oliveira & Pedroza (2020); Vilella (2012); Souza & Vilella (2013); Pimentel et al. (2012); Mayrinki (2016); Borges et al. (2006); Bastos et al. (2008);	not		not		Seed	22	CR
Sporophila melanogaster	Sporophila melanogaster	yes (LT)	Alves et al. (2012); Tavares et al. (2013); Queiroz et al. (2016); Costa et al. (2018); Bastos et al. (2008)	not		not		Seed	9.2	VU
Sporophila nigrorufa	Sporophila nigrorufa	yes (LT)	Queiroz et al. (2016); Vilella (2012);	not		not		Seed	7.8	VU
Sporophila palustris	Sporophila palustris	yes (LT)	Tavares et al. (2013); Queiroz et al. (2016); Costa et al. (2018); Vilella (2012); Souza & Vilella (2013)	not		not		Seed	8.2	VU
Sporophila ruficollis	Sporophila ruficollis	yes (LT)	Queiroz et al. (2016); Costa et al. (2018); Vilella (2012); Souza & Vilella (2013);	yes (WS)		not		Seed	8.3	VU
Cardinalidae
Caryothraustes canadensis frontalis	Caryothraustes canadensis	yes (LT)	Tavares et al. (2013)	not		not		Fruit	34	EN
Fringilidae										VU
Spinus yarrellii	Carduelis yarrellii	yes (LT)	Pereira & Brito (2005); Gama & Sassi (2008); Regueira & Bernard (2012); Tavares et al. (2013); Queiroz et al. (2016); Souto et al. 2017; Costa et al. (2018); Vilella (2012); Souza & Vilella (2013); Paixão et al. (2013); Pagano et al. (2009); Fernandes-Ferreira (2012); Alves et al. (2010)	yes (WS)		yes (AP)	ICMBio (2019)	Omnivore	15.4	VU
References
Alves, R.R.N., Nogueira, E.E.G., Araujo, H.F.P., Brooks, S.E., 2010. Bird-keeping in the Caatinga, NE Brazil. Hum. Ecol. 38:147–156. DOI: 10.1007/s10745-009-9295-5
Amaral, A.C.A., Araújo, A.E., de Sousa, A.E.B.A., Lugarini, C., Miyaki, C.Y., Lima, D.M., de Assis, E.C.P., Crepaldi, I.C., Campos, I.B., do Nascimento, J.L.X., dos Santos Neto, J.R., da Rocha, K.M.R., de Oliveira, K.G., Guedes, N.M.R., Scherer Neto, P., Linares, S.F.T.P., Aguilar, T.M., Bosh, T.M., Barros, Y.M., 2012. Plano de ação nacional para a conservação da Arara-azul-de-lear. Instituto Chi…
Araújo, A.C.B., Behr, E.R., Longhi, S.J., de Menezes, P.T.S., Kanieski, M.R., 2010. Diagnóstico sobre a avifauna apreendida e entregue espontaneamente na Região Central do Rio Grande do Sul, Brasil. R. bras. Bioci 8 (3): 279–284.
AZAB. 2018. Programa de manejo Ex Situ de espécies ameaçadas. In:<https://www.azab.org.br/more/19/programa-de-manejo-ex-situ-de-especies-ameacadas>. Acess:25/08/2022.
Barros, Y.M., Soye, Y., Miyaki, C.Y., Watson, R., Crosta, L., Lugarini, C., 2012. Plano de ação nacional para a conservação da Ararinha-azul (Cyanopsitta spixii). Instituto Chico Mendes de Conservação da Biodiversidade, 140p. Brasília, DF.
Bastos, L.F., Luz, V.L.F., dos Reis, I.J., Souza, V.L., 2008. Apreensão de espécimes da fauna silvestre em Goiás – Situação e destinação. Rev. Biol. Neotrop. 5(2): 51–63.
Borges, R.C., de Oliveira, A., Bernardo, N. & da Costa, R.M.M.C., 2006. Diagnóstico da fauna silvestre apreendida e recolhida pela Polícia Militar de Meio Ambiente de Juiz de Fora, MG (1998 e 1999). Revista Brasileira de Zoociências. 8 (1): 23–33.
Charity, S. & Ferreira, J.M., 2020. Wildlife trafficking in Brazil. TRAFFIC International, Cambridge, United Kingdom.
Conde, D.A., Flesness, N., Colchero, F., Jones, O.R., Scheuerlein, A. 2011. An emerging role of Zoos to conserve biodiversity. SCIENCE, V. 331. p. 1390-1391.
Costa, F.J.V., Ribeiro, R.E., de Souza, C.A., Navarro, R.D., 2018. Espécies de aves traficadas no Brasil: Uma meta-análise com ênfase nas espécies ameaçadas. Fronteiras: Journal of Social, Technological and Environmental Science. http://periodicos.unievangelica.edu.br/fronteiras/ 7(2): 324–346. DOI: http://dx.doi.org/10.21664/2238-8869.2018v7i2.p324-346
De Luca, A. C., Reisfeld, A., Bueno, D.D.P.O., da Silva, I.S.P., Araújo, R.E., 2017. Protocolo experimental para soltura e monitoramento de aves vítimas de comércio ilegal de animais silvestres no estado de São Paulo.SMA/SAVE Brasil. 104p. São Paulo, SP.
Fernandes-Ferreira, H., Mendonça, S.V., Albano, C., Ferreira, F.S., Alves, R.R.N., 2012. Hunting, use and conservation of birds in Northeast Brazil. Biodivers Conserv 21, 221–244. DOI: 10.1007/s10531-011-0179-9
Ferreira, C.M. & Glock, L., 2004. Diagnóstico preliminar sobre avifauna traficada no Rio Grande do Sul, Brasil. BIOCIÊNCIA 12(1): 21–30. Porto Alegre, RS.
Francisco, M.R., Costa, M.C., Azeredo, R.M.A., Simpson, J.G.P., Dias, T.C., Fonseca, A., Pinto, F.J.M., Silveira, L.F., 2020. Recovered after an extreme bottleneck and saved by ex situ management: Lessons from the Alagoas curassow (Pauxi mitu [Linnaeus, 1766]; Aves, Galliformes, Cracidae). Zoo Biology. 1–3. DOI: https://doi.org/10.1002/zoo.21577
Gama, T.P. & Sassi, R., 2008. Aspectos do comércio ilegal de pássaros silvestres na cidade de João Pessoa, Paraíba, Brasil. Gaia Scientia 2(2): 01–20.
Gomes Destro,G.F., Pimentel, T.L., Sabaini, R.M., Borges, R.C., Barreto, R., 2012. Efforts to Combat Wild Animals Trafficking in Brazil. INTECH Open Science. DOI: http://dx.doi.org/10.5772/48351
Graf, R., Pfleiderer, J., Fritsche, M., Schmidt, J., Mantei, R., Peter, S.P., Spangenberg, F. 2021. Zootierliste. In:<https://www.zootierliste.de/en/?klasse=2>. Acess:01/09/2022.
Hughes, B., Dugger, B., Cunha, H. J., Lamas, I., Goerck, J., Lins, L., Silveira, L.F., Andrade, R., Bruno, S.F., Rigueira, S., Barros, Y.M., 2006. Plano de ação nacional para a conservação do Pato-mergulhão (Mergus octosetaceus). Instituto Chico Mendes de Conservação da Biodiversidade/IBAMA, Brasília, DF.
ICMBIO, 2012. Plano de Ação Nacional para a conservação da Ararinha-azul. ICMBIO/MMA. Brasília, DF.
ICMBIO, 2012. Plano de Ação Nacional para a conservação da Arara-azul-de-lear. 2. ed. ICMBIO/MMA. Brasília, DF.
ICMBIO, 2016. Plano de Ação Nacional para a conservação das aves da Amazônia: Sumário executivo. ICMBIO/MMA. Brasília, DF.
ICMBIO, 2018. Plano de Ação Nacional para a conservação das aves da Mata Atlântica: Sumário executivo. ICMBIO/MMA. Brasília, DF.
ICMBIO, 2019. Plano de Ação Nacional para a cosnervação das aves da Caatinga: Sumário executivo. ICMBIO/MMA. Brasília, DF.
ICMBIO, 2020. Plano de Ação Nacional para a conservação dos Papagaios: Sumário executivo. ICMBIO/MMA. Brasília, DF.
ICMBIO, 2020. Plano de Ação Nacional para a conservação do Pato-mergulhão: Sumário executivo. ICMBIO/MMA. Brasília, DF.
ICMBIO, 2021. Plano de Ação Nacional para a conservação das aves dos Campos Sulinos: Sumário executivo. ICMBIO/MMA. Brasília, DF.
Lees, A.C., Devenish, C., Areta, J.I., de Araújo, C.B., Keller, C., Phalan, B., Silveira, L.F., 2021. Assessing the extinction probability of the Purple-winged Ground Dove, an enigmatic bamboo specialist. Front. Ecol. Evol. DOI: https://doi.org/10.3389/fevo.2021.624959
Mayrink, R.R., 2016. Exame pericial para detecção de fraudes em anilhas oficiais de passeriformes: uma ferramenta para o combate ao tráfico de animais silvestres. Dissertação submetida ao Programa de Mestrado Profissional em Perícias Criminais Ambientais da Universidade Federal de Santa Catarina para a obtenção do grau de mestre em Perícias Criminais Ambientais. Florianópolis, SC.
Nascimento, J.L.X., Bencke, G.A., Oliveira, G., Serafini, P.P., Saboia, L.V., Gomes, M., Ferreira, C.M., Blumetto, O., Fontana, C.S., Repenning, M., Mahler, B., Bulau, S., 2014. Programa de Cativeiro do Cardeal-Amarelo (Gubernatrix cristata). Instituto Chico Mendes de Conservação da Biodiversidade – CEMAVE, Brasília, DF.
Oliveira, M.C. & Pedroza, D., 2020. Aves silvestres criadas em cativeiro na cidade de Eirunepé, médio rio Juruá, sudoeste da Amazônia brasileira. Bol. Mus. Para. Emílio Goeldi. Cienc. Nat. 15(2): 467-473. DOI: http://doi.org/10.46357/bcnaturais.v15i2.189
Pagano, I.S.A., Sousa, A.B.E.A., Wagner, P.G.C., Ramos, R.T.C., 2009. Aves depositadas no Centro de Triagem de Animais Silvestres do IBAMA na Paraíba: uma amostra do tráfico de aves silvestres no estado. Ornithologia 3 (2):132–144.
Paixão, R.M.C., Silvestre, L.C., Pessoa, T.S.A., Sousa, A.E.B.A., 2013. Entre saberes e observações: a manutenção em cativeiro de passeriformes silvestres em uma comunidade da Zona da Mata Paraibana. Atualidades Ornitológicas On-line 174.
Pereira, G.A. & de Brito, M.T., 2005. Diversidade de aves silvestres brasileiras comercializadas nas feiras livres da Região Metropolitana do Recife, Pernambuco. Atualidades ornitológicas, n. 126. 14p.
Preuss, J.F. & Schaedler, P.F., 2011. Diagnóstico da fauna silvestre apreendida e resgatada pela polícia militar ambiental de São Miguel do Oeste, Santa Catarina, Brasil. Unoesc & Ciência – ACBS, Joaçaba 2, n. 2, 141–150.
Queiroz, A.L.L., dos Santos Filho, A.M.P., Duar, B.A., de Carvalho, C.B.V., Pinto, C.J.C., Vilela, D.A.R., Costa, F.J.V., Monteiro, K.R.G., Spricigo Junior,L., Albuquerque, M.M.P., Mayrink, R.R., Lopes, V.A., 2016. Guia de identificação de aves traficadas no Brasil. Florianópolis: BECONN/Ministério da Justiça. 200p.
RENCTAS., 2001. I relatório nacional sobre tráfico de animais silvestres. RENCTAS. Disponível em:< https://renctas.org.br/trafico-de-animais/>.
Silva, S.M., & Lima, R.A. 2014. Levantamento da fauna silvestre no centro de reabilitação do batalhão da polícia militar ambiental nos anos de 2010, 2011 e 2013 no município de Candeias do Jamari-RO. Revista do Centro do Ciências Naturais e Exatas - UFSM, Santa Maria Revista Eletrônica em Gestão, Educação e Tecnologia Ambiental 18 (1): 296–311. DOI: http://dx.doi.org/10.5902/2236117012289
Schunck, F., Somenzari, M., Lugarini, C., Soares, E.S., 2010. Plano de Ação Nacional para a conservação dos papagaios da Mata Atlântica. Instituto Chico Mendes de Conservação da Biodiversidade, Brasília, DF.
Sick, H., 1997. Ornitologia Brasileira. Editora Nova Fronteira, RJ.
Silveira, L.F., Roda, S.A., Santos, A.M.M., Soares, E.S., Bianchi, C.A., 2008. Plano de ação nacional para a conservação do Mutum-de-Alagoas (Pauxi mitu). Instituto Chico Mendes de Conservação da Biodiversidade, Brasília, DF.
Silveira, L.F., Soares, E.S., Bianchi, C.A., 2008. Plano de ação nacional para a conservação dos Galliformes ameaçados de extinção (acaruãs, jacus, jacutingas, mutuns e urus). Instituto Chico Mendes de Conservação da Biodiversidade, Brasília, DF.
Souza, T.O. & Vilela, D.A.R., 2013. Espécies ameaçadas de extinção vítimas do tráfico e criação ilegal de animais silvestres. Atualidades Ornitológicas On-line 176.
Tavares, D.O., Mariano, K.P., Lemos, L.L.J., 2013. Passeriformes permitidos em cativeiro. SEMARH/Gov. Goiás. 1, 1–176. Goiânia, GO.
Vilela, D.A.R., 2012. Diagnóstico de situação dos animais silvestres recebidos nos CETAS brasileiros e Chlamydophila psittaci em papagaios (Amazona aestiva) no CETAS de Belo Horizonte, MG. Tese apresentada à Universidade Federal de Minas Gerais, Escola de Veterinária, como requisito parcial para obtenção do título de Doutor em Ciência Animal. Área de Concentração: Medicina Veterinária Preventiva …
Vilarta, M.R., Wittkoff, W., Lobato, C., Oliveira, R.A., Pereira, N.G.P., Silveira, L.F., 2021. Reintroduction of the Golden Conure (Guaruba guarouba) in Northern Brazil: Establishing a population in a protected área. Diversity. 13, 198, 8p. DOI: https://doi.org/10.3390/d13050198
Wajntal, A., Nunes, B., Bianchi, C., Olmos, F., Magnani, F., Scheres, G., Pereira, G., Simpson, J., Silveira, L.F., de Andrade, M.A., de Freitas, M.V., Marini Filho, O., Cordeiro, P.C., Dantas, P.H., McGowan, P., de Jesus, R., Belterman, R., Azeredo, R., Neto, S., Farias, T., 2004. Plano de ação nacional para conservação do Mutum-do-Sudeste (Crax blumenbachii). Instituto Chico Mendes de Conservaç…
